# Supplementary material for: In situ generation of a soft–tough asymmetric composite electrolyte for dendrite-free lithium metal batteries
Source: Royal Society of Chemistry journal article supplement (doi:10.1039/d0ta11748j), 2021-01-01
Supplement: d0ta11748j1.pdf [file d0ta11748j1.pdf]

Supplementary Information for

**In situ generation of soft-tough asymmetric composite  
electrolyte for dendrite-free lithium metal batteries**

Ningyue Zhang<sup>a,b</sup>, Guoxu Wang<sup>b</sup>, Ming Feng<sup>\*a</sup> and Li-Zhen Fan<sup>\*b</sup>

<sup>a</sup>Key Laboratory of Functional Materials Physics and Chemistry of the Ministry of Education,  
Jilin Normal University, Changchun 130103, P. R. China.

<sup>b</sup>Beijing Advanced Innovation Center for Materials Genome Engineering, Beijing Key  
Laboratory for Advanced Energy Materials and Technologies, University of Science and  
Technology Beijing, Beijing 100083, China.

\*Corresponding authors: [mingfeng@jlnu.edu.cn](mailto:mingfeng@jlnu.edu.cn) (M. Feng); [fanlizhen@ustb.edu.cn](mailto:fanlizhen@ustb.edu.cn) (L-Z. Fan)

## Supplementary Figures

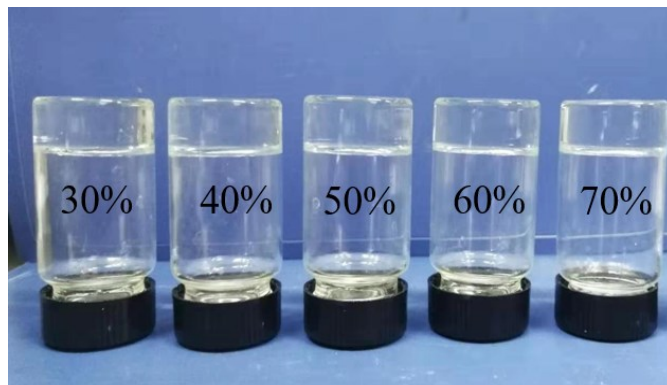

Fig. S1 Photo of TPGDA with varied amounts of LE after the polymerization process.

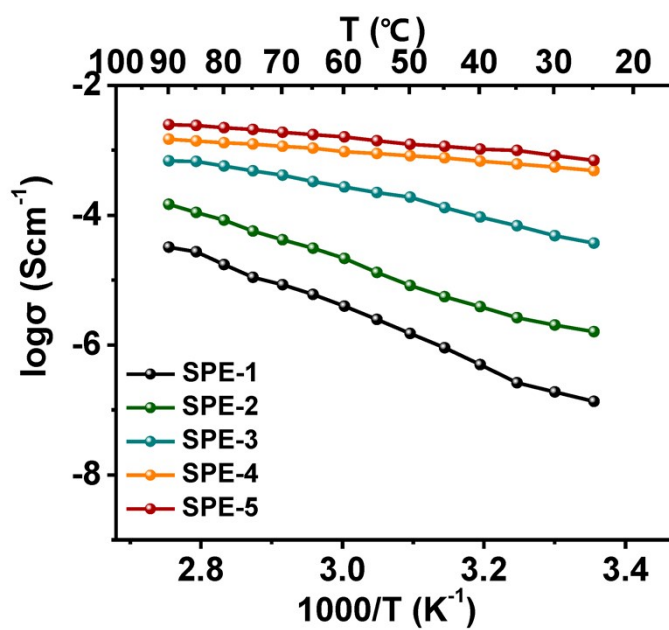

Fig. S2 The ionic conductivity of the SPE with different content of LE.

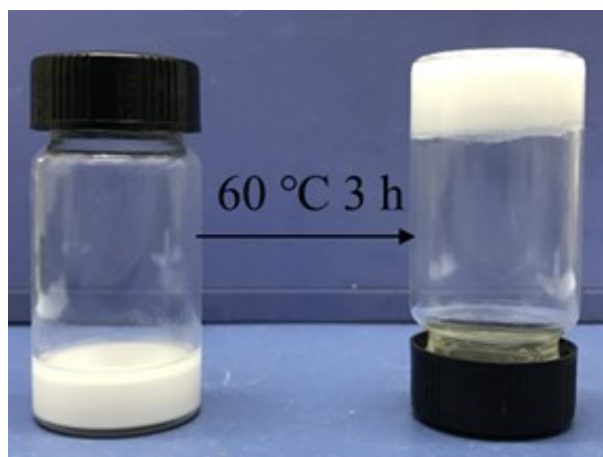

**Fig. S3** The typical image of composite electrolyte precursor solution before and after heating at 60 °C for 3 h.

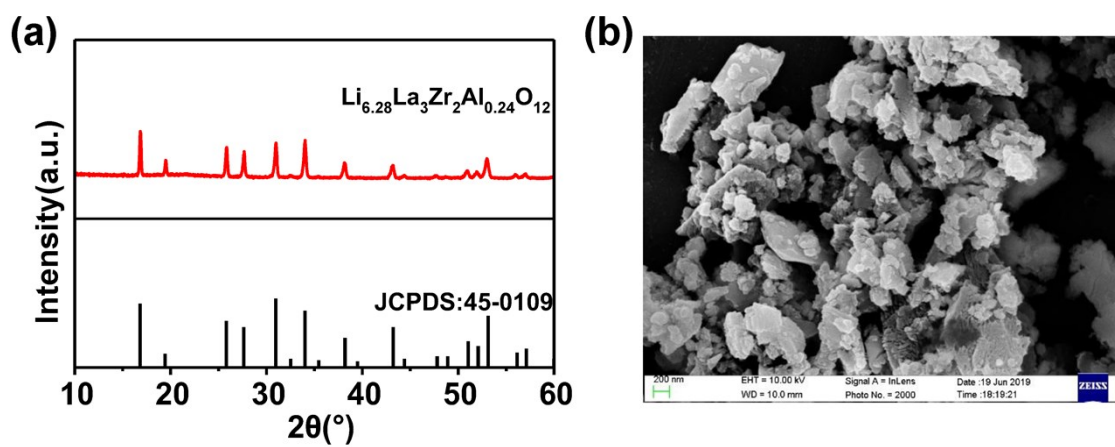

**Fig. S4** (a) XRD pattern and (b) SEM image of the LLZAO powders.

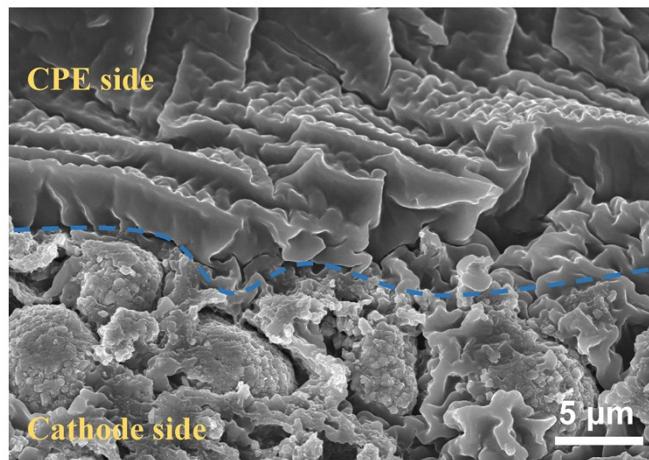

**Fig. S5** SEM cross-section image of the CPE and NCM cathode layer interface.

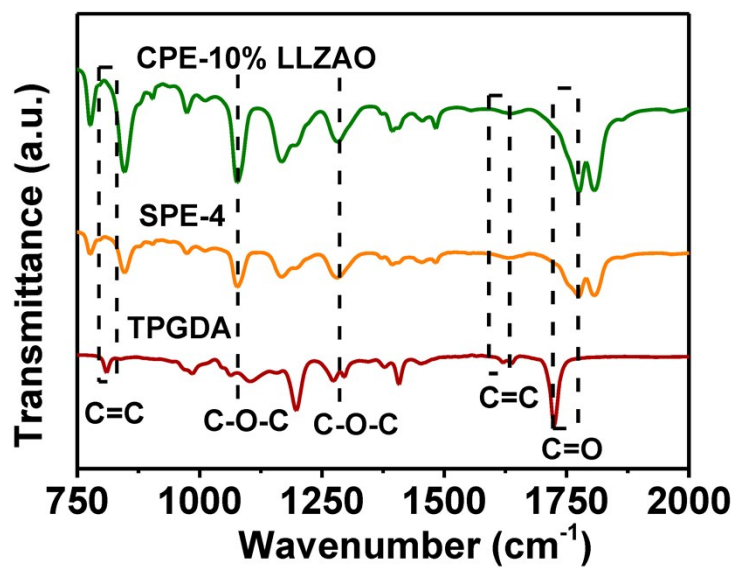

**Fig. S6** FTIR adsorption spectra of TPGDA, SPE-4, and CPE-10%LLZAO.

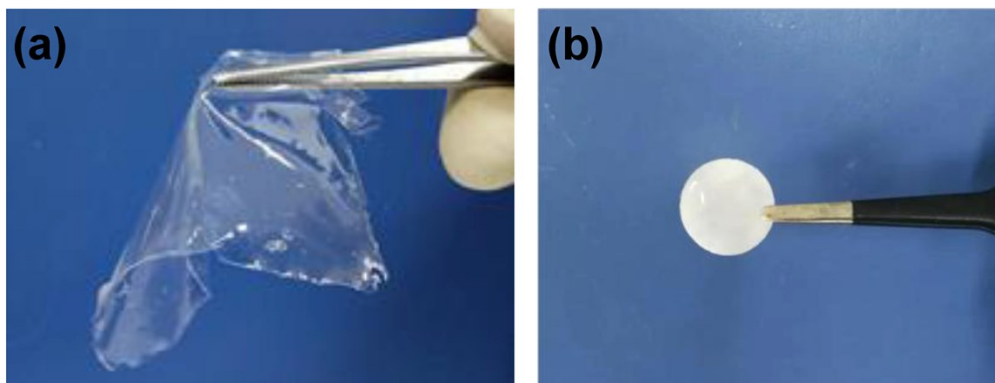

Fig. S7 The digital images of (a) TPGDA polymer electrolyte (b) CPE-10%LLZAO electrolyte.

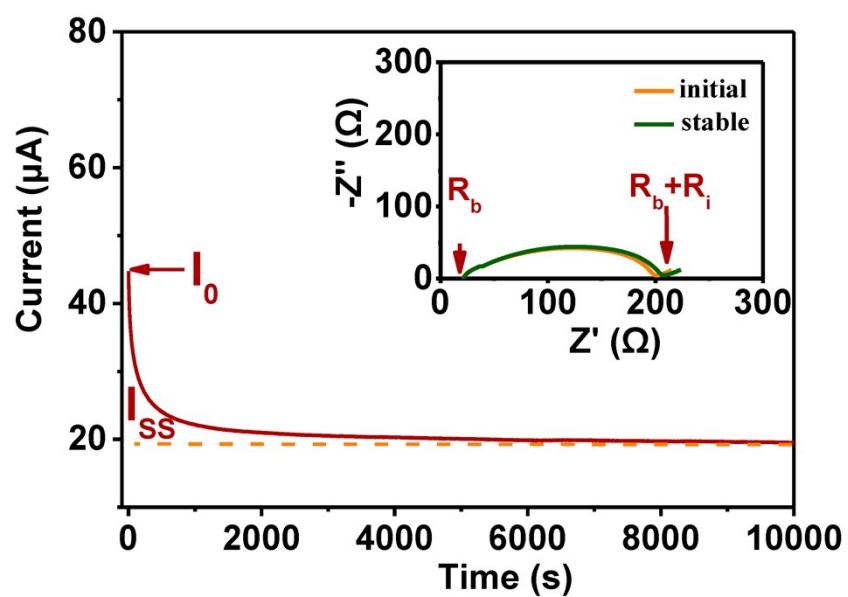

Fig. S8 Current variation with time of a symmetrical Li/SPE-4/Li cell.

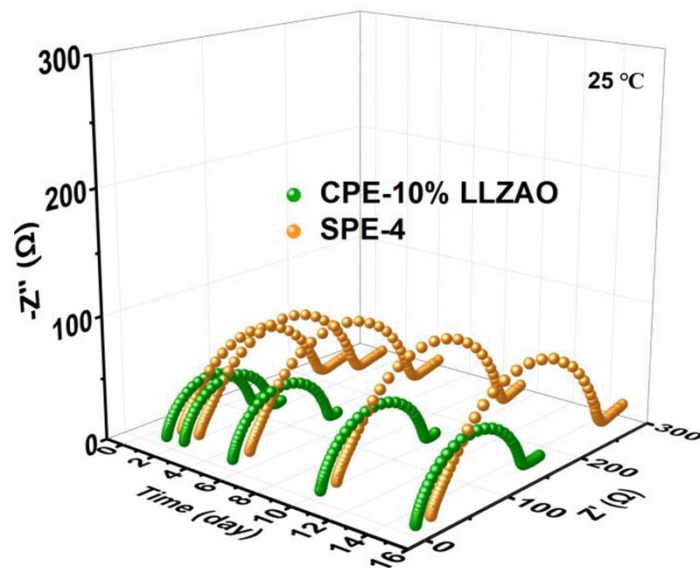

**Fig. S9** Impedance response with time evolution of the Li/CPE-10%LLZAO/Li and Li/SPE-4/Li.

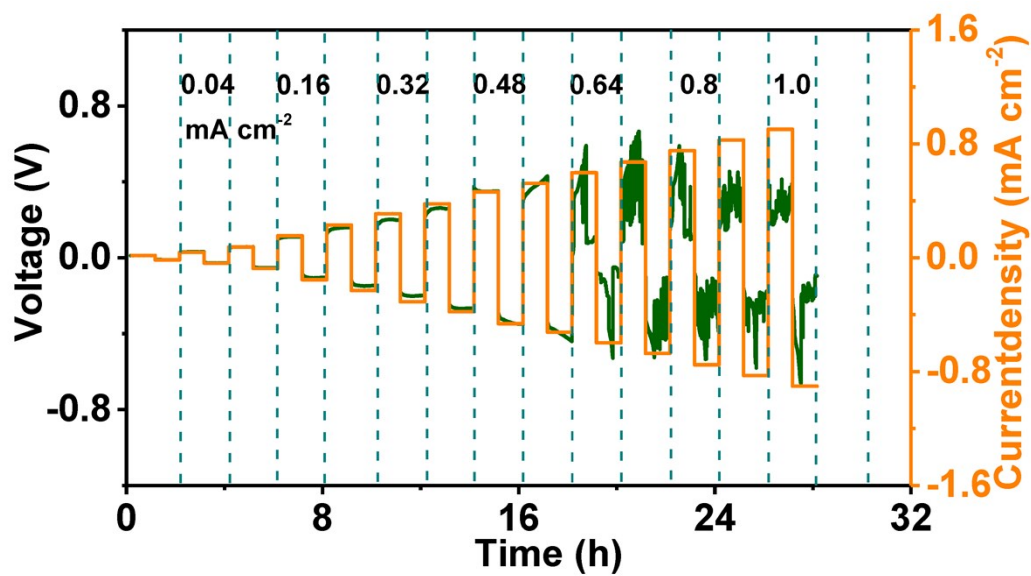

**Fig. S10** Direct current cycling of Li/CPE-10%LLZAO/Li symmetrical cell, stepping the current density from 0.02 to 1.0  $\text{mA cm}^{-2}$ .

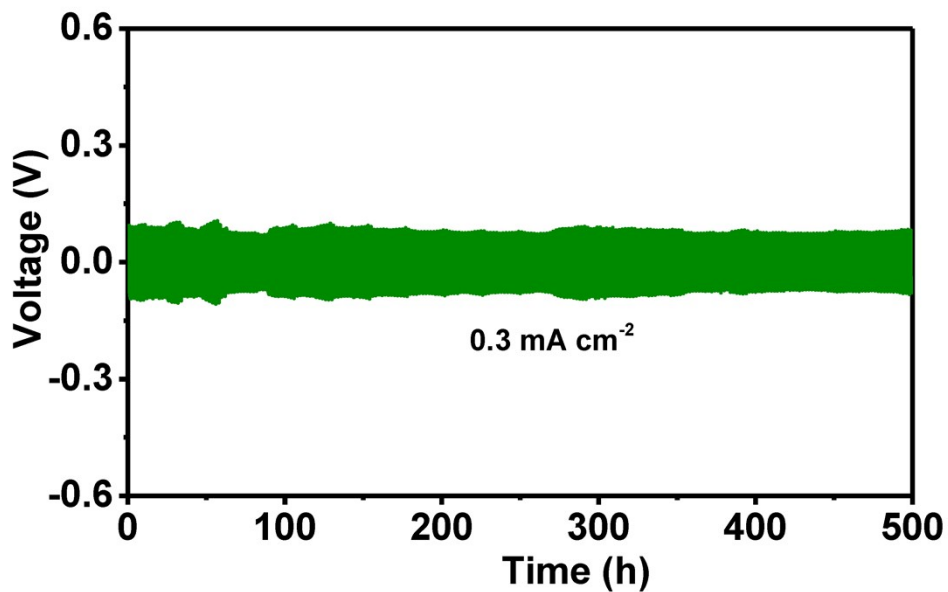

**Fig. S11** Galvanostatic cycling data of Li/CPE-10%LLZAO/Li symmetrical cells at a current density of  $0.3 \text{ mA cm}^{-2}$ .

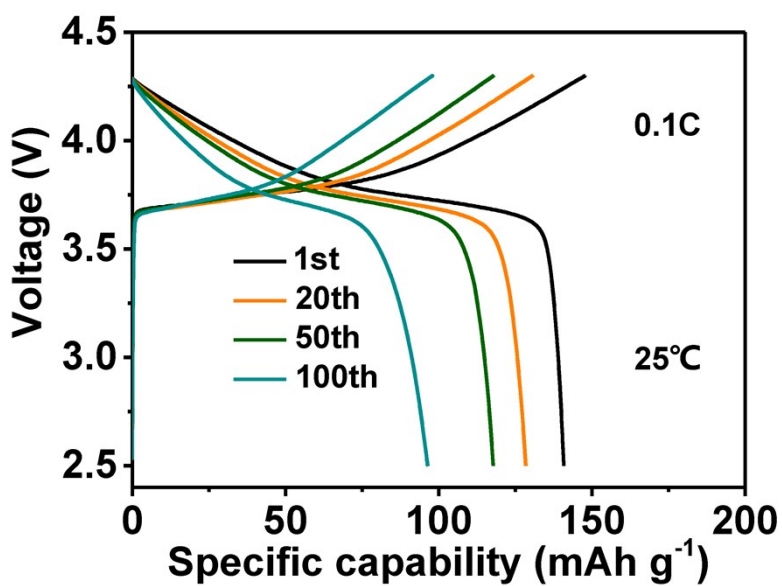

**Fig. S12** charge and discharge voltage profiles of SPE-4 based NCM/Li at different cycles with 0.1C.
